# Supplementary material
Source: publisher site journal article supplement (https://en-cdn.bio-protocol.org/attached/file/20180610/2884%20Supplemental%20Figure%20S1.docx)

**
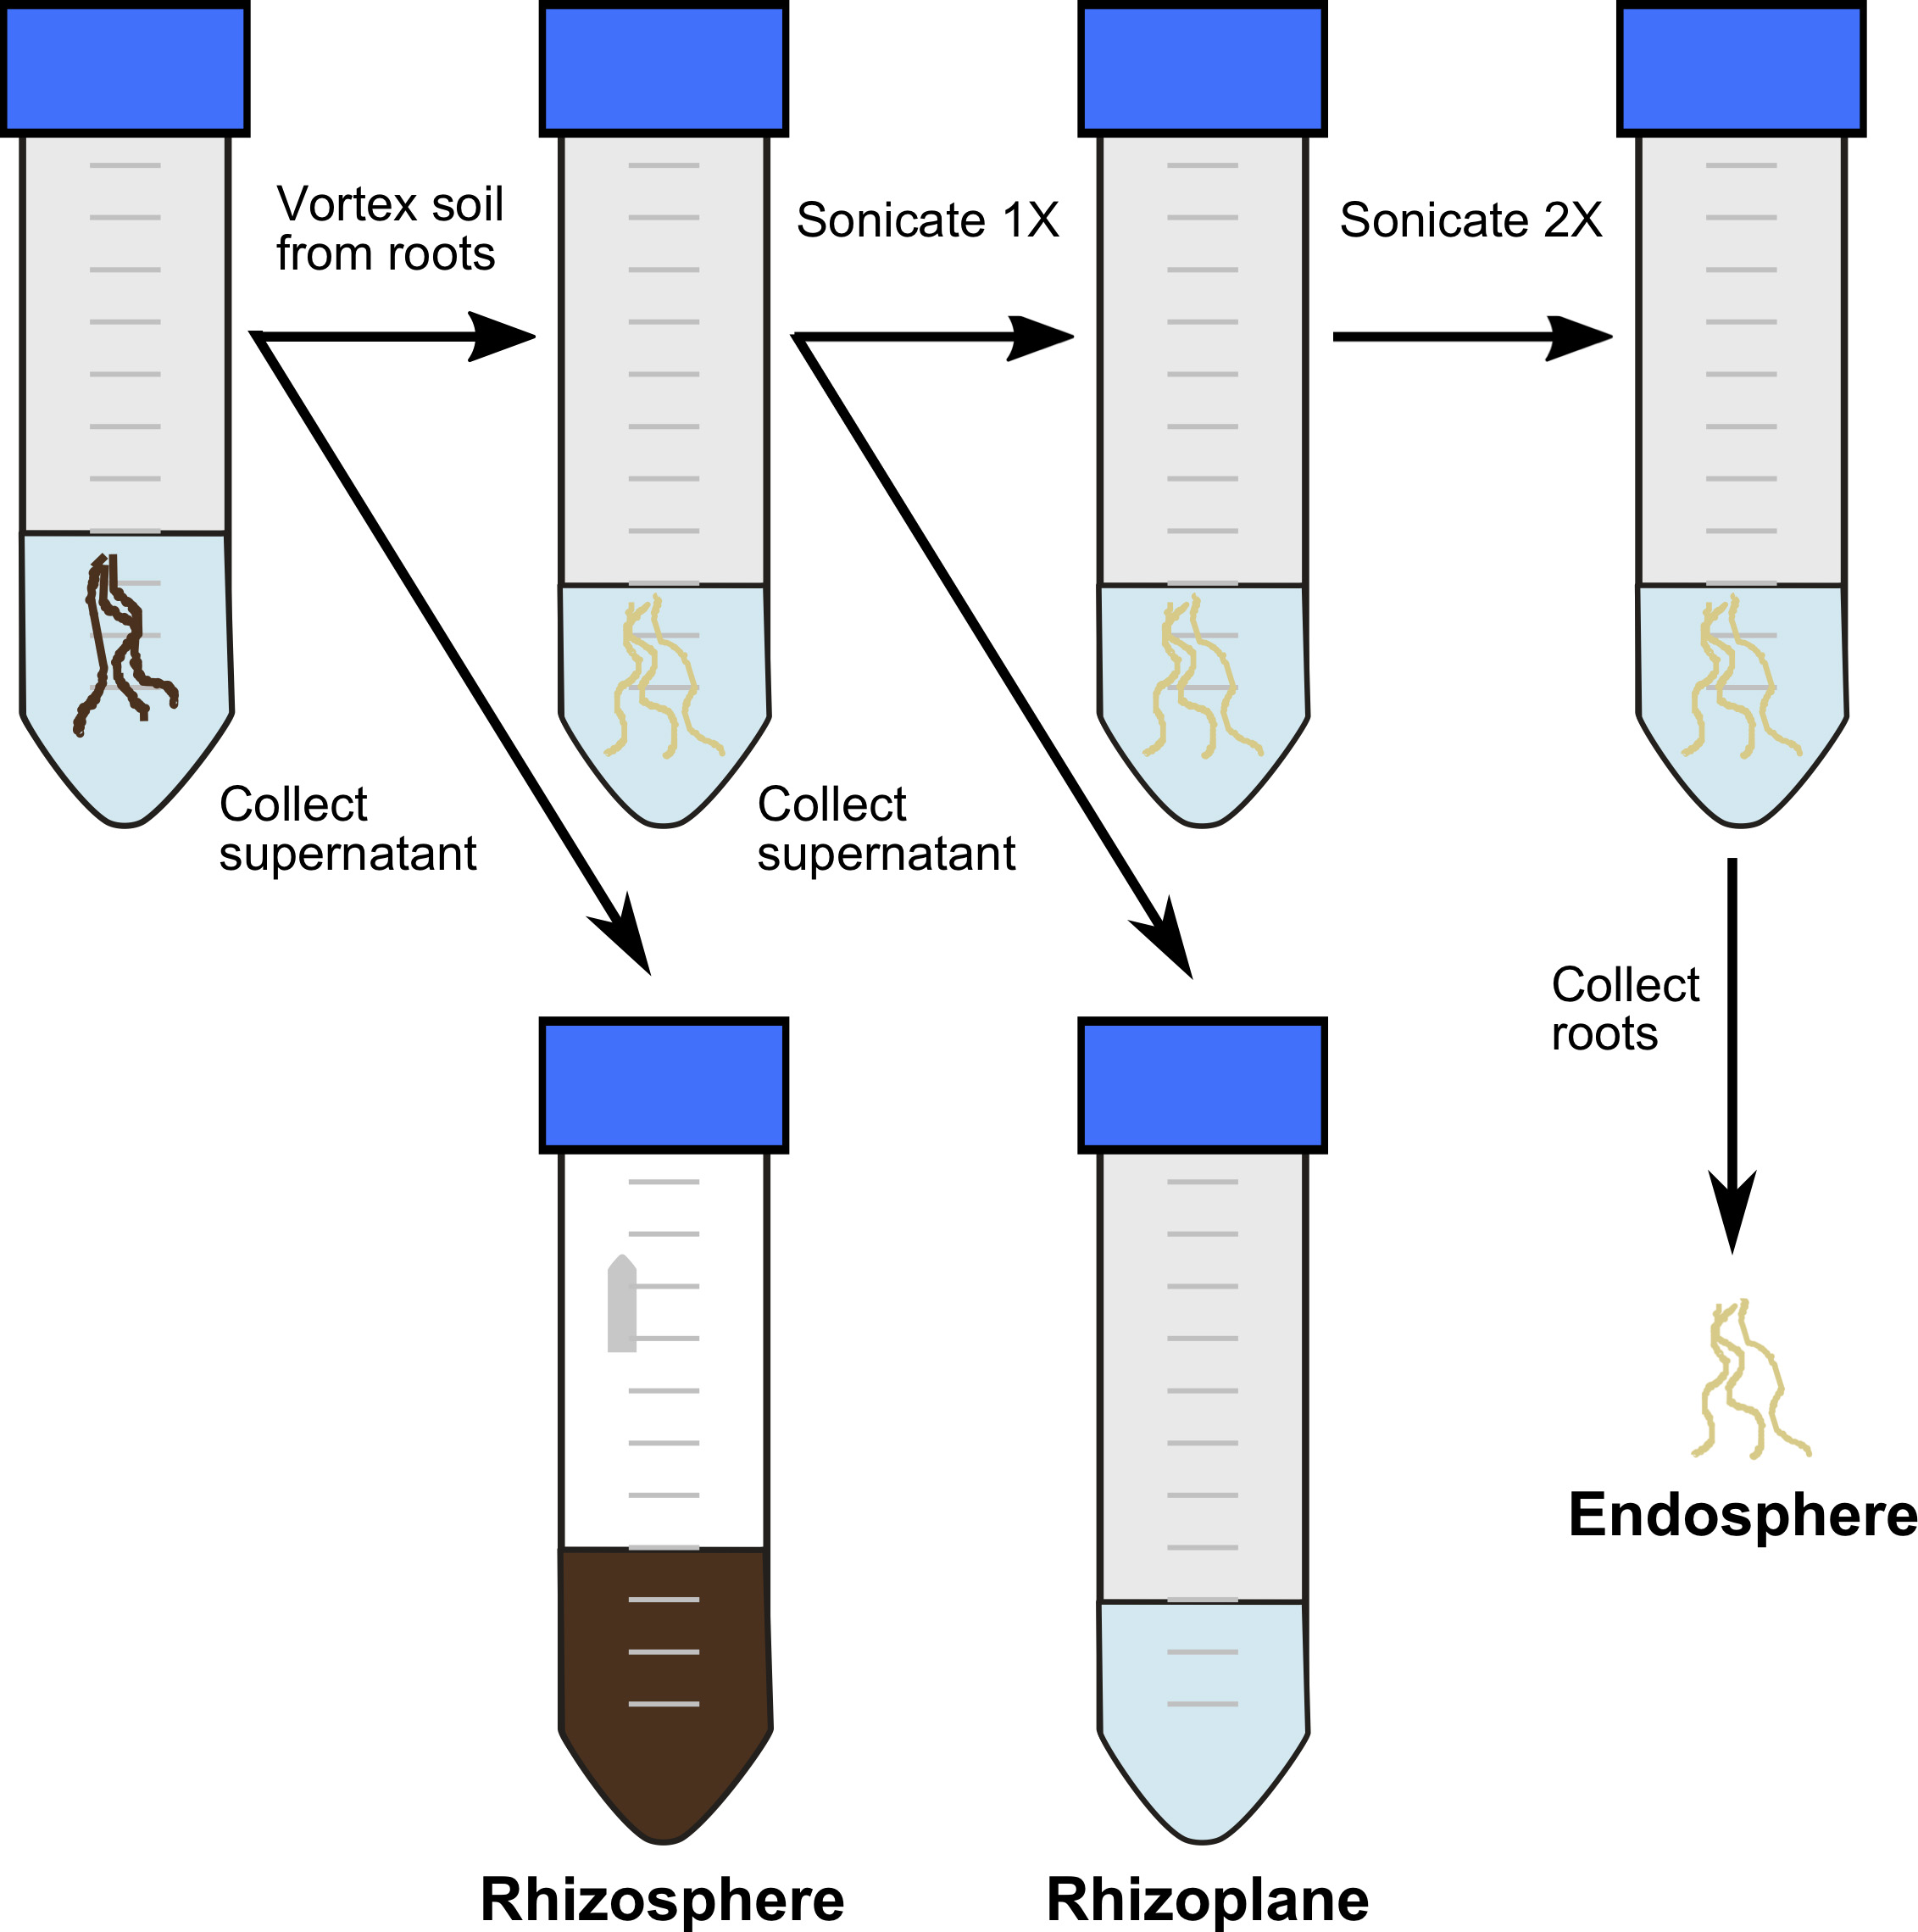
**

**Figure S1. Compartment separation of root-associated microbiota**

Supplement: Supplementary file 1 [file 2884%20Supplemental%20Figure%20S1.docx]
